# Supplementary material for: Genomic and Immunological Features of Micropapillary Pattern in Lung Adenocarcinoma
Source: Research Square preprint supplement (doi:10.21203/rs.3.rs-1215973/v1), 2022-01-10
Supplement: Supplementary file 3 [file b558329b9b8c92c3d97829a8.docx]

**Supplementary Figure Legends:**

**Supplementary Figure 1. Survival status of 286 selected patients.** (A) DFS of patients with different predominant histologic subtypes. (B) OS of patients with different predominant histologic subtypes.

**Supplementary Figure 2. Mutational analysis results for LEP and MIP components.** (A) Numbers of SNVs and InDels in LEP and MIP samples from 6 patients after filtrations. (B) Mutation frequency of the 23 top mutated-genes in public cohorts, including Lung-Broad, Lung-OncoSG and TCGA-LUAD.(C) The point substitution spectrum plot for LEP and MIP components. (D) Intersection on the top Reactome pathways enriched in mutated oncogenes for two subtypes.

**Supplementary Figure 3.** **Pathway enrichment on mutated TSG in public cohorts.** (A) Enriched terms in LEP samples from Lung-Broad. (B) Enriched terms in MIP samples from Lung-Broad. (C) Enriched terms in LEP samples from Lung-OncoSG. (D) Enriched terms in MIP samples from Lung-OncoSG. (E) Enriched terms in LEP samples from TCGA-LUAD. (F) Enriched terms in MIP samples from TCGA-LUAD.

**Supplementary Figure 4. Pathway enrichment on mutated oncogenes in public cohorts.** (A) Enriched terms in LEP samples from Lung-Broad. (B) Enriched terms in MIP samples from Lung-Broad. (C) Enriched terms in LEP samples from Lung-OncoSG. (D) Enriched terms in MIP samples from Lung-OncoSG. (E) Enriched terms in LEP samples from TCGA-LUAD. (F) Enriched terms in MIP samples from TCGA-LUAD.

**Supplementary Figure 5. Somatic copy number alternation and clonalily-related analysis results for two subtypes.** (A) Illustration on the segments with amplification and deletion. (B) Chromosome level copy number variation (CNV) burden in two subtypes. (C) Arm level CNV burden in two subtypes. (D) MATH score distribution in two groups. (E) Frequency of clonal mutations on DNA Damage Response (DDR) and WNT pathway genes in sequenced samples.

**Supplementary Figure 6. Enrichment results on mutated genes derived from phylogenetic analyses.** (A) Pathways enriched in LEP-private mutated driver genes. (B) Pathways enriched in MIP-private mutated driver genes. (C) GO terms for genes with increased mutational clonality in MIP component. (D) GO terms for genes with increased mutational clonality in LEP component.

**Supplementary Figure 7. Signaling pathways enriched in genes with shared focal CNV alternations in two histological subtypes.** (A) Pathways enriched in genes with shared deletions in MIP and LEP components. (B) Pathways enriched in genes with shared amplifications in MIP and LEP components.

**Supplementary Figure 8. Analysis results on genes possessing dynamic variant allele frequency (VAF) mutational alternation between two histological components.** (A) Mutation clusters identified respectively from 5 patients. Clusters with drastically increased VAF in LEP subtype were marked with blue circles while those with increased VAF in MIP component were marked with red dots. (B) Pathway enriched in genes with increased VAF in LEP component. (C) Pathway enriched in genes with increased VAF in MIP component.

**Supplementary Figure 9. Correlation analyses on RNA expression and copy number alternation of RCSD1, EZR, PTP4A3, NAPRT and RECQL4 in our samples and public cohorts.** (A) Spearman’s correlation coefficient (SCC) on the genes’ copy number alternation pattern in our samples. (B) SCC on the genes’ copy number alternation pattern in LEP and MIP samples from Lung-Broad cohort. (C) Correlation analysis in Lung-OncoSG cohort. Left: SCC on the five genes’ copy number alternation pattern in LEP and MIP sample. Middle: SCC on the five genes’ expression level in all sample. Right: SCC on the five gene’s expression level in LEP and MIP sample. (D) Correlation analysis in TCGA-LUAD cohort. Left: SCC on the five genes’ copy number alternation pattern in LEP and MIP sample. Middle: SCC on the five genes’ expression level in all sample. Right: SCC on the five gene’s expression level in LEP and MIP sample. (E) Correlation between copy number alternation and expression values of PTP4A3 on all samples from TCGA-LUAD cohort. (F) Correlation between copy number alternation and expression values of PTP4A3 on LEP and MIP samples from TCGA-LUAD cohort. (G) Expression level of PTP4A3 in TCGA-LUAD cohort. Left: on normal and tumor samples. Right: on LEP and MIP samples. (H) Expression level of NAPRT in TCGA-LUAD cohort. Left: on normal and tumor samples. Right: on LEP and MIP samples. (I) Expression level of RECQL4 in TCGA-LUAD cohort. Left: on normal and tumor samples. Right: on LEP and MIP samples.

**Supplementary Figure 10. The relationship between overall survival (OS) and three co-amplified genes (PTP4A3, NAPRT and RECQL4) in public cohorts.** (A) OS of all patients with higher and lower summed expression of the three genes in Lung-OncoSG cohort. (B) Similar with (A), but only selecting LEP and MIP patients. (C) OS of all patients with higher and lower summed expression of the three genes in TCGA-LUAD cohort. (D) Similar with (C), but only selecting LEP and MIP patients. (E) OS of all patients with higher and lower summed CNV of the three genes in TCGA-LUAD cohort. (F) Similar with (E), but only selecting LEP and MIP patients.

**Supplementary Figure 11. Immune infiltration analysis on Lung-OncoSG cohort.** (A) Immune infiltration levels in MIP and LEP samples. Mutational status of EGFR was plotted above the heatmap. (B) Correlation coefficients between the 3 co-amplified genes’ SCNA level and the immune cell infiltration levels in LEP and MIP subtype. Only top entries were shown. (C) RNA expression of PTP4A3 was negatively correlated with CD4+ T memory cell infiltration. (D) RNA expression of NAPRT was negatively associated with cancer-associated fibroblast (CAF) amount.

**Supplementary Figure 12.** **Immune infiltration analysis on the GEO cohort.** (A) Immune infiltration levels in indolent histological subtype and relatively aggressive subtype. P-values were calculated by two-sided Mann-Whitney test and adjusted by Benjamini-Hochberg method. Significant entries were marked with circles. (B) Correlation of the 3 co-amplified genes’ RNA expression level and the immune cell infiltration levels in LEP and MIP subtype. Only top entries were shown.

**Supplementary Figure 13. Immune infiltration analysis on TCGA-LUAD cohort.** (A) Immune infiltration levels in MIP and LEP samples. Mutational status of EGFR was plotted above the heatmap. (B) Correlation coefficients between the 3 co-amplified genes’ SCNA level and the immune cell infiltration levels in LEP and MIP subtype. Only top entries were shown. (C) Correlation coefficients between the 3 co-amplified genes’ RNA expression level and the immune cell infiltration levels in LEP and MIP subtype. Only top entries were shown.

**Supplementary Figure 14.** **Inspection on the cancer immunity cycle activity in Lung-OncoSG, GEO and TCGA-LUAD cohorts.** (A) Cancer immunity cycle activity in Lung-OncoSG cohort. (B) Cancer immunity cycle activity in GEO cohort. (C) Cancer immunity cycle activity in TCGA-LUAD cohort. P-values were calculated by two-sided Mann-Whitney test and adjusted by Benjamini-Hochberg method.

**Supplementary Figure 15.** **Multi-omics comparison on expressions of PD-1 and PD-L1 in public cohorts.** (A) RNA expression level of PD-1 on LEP and MIP samples from Lung-OncoSG cohort. (B) RNA expression level of PD-1 on indolent and relatively aggressive subtypes from GEO cohort. (C) RNA expression level of PD-1 on LEP and MIP samples from TCGA-LUAD cohort. (D) RNA expression level of PD-L1 on LEP and MIP samples from Lung-OncoSG cohort. (E) RNA expression level of PD-L1 on indolent and relatively aggressive subtypes from GEO cohort. (F) RNA expression level of PD-L1 on LEP and MIP samples from TCGA-LUAD cohort. (G) Differential expressed proteins between LEP and MIP samples from TCGA-LUAD cohort. Only proteins with P-value<0.01 (one sided student’s t-test) were shown. (H) Pathways enriched in genes with elevated protein level expression in MIP group. (I) Correlation between PD-L1 protein expression and summed expression levels of PTP4A3, NAPRT and RECQL4 in TCGA-LUAD cohort.
