# Supplementary material for: Genomic and Immunological Features of Micropapillary Pattern in Lung Adenocarcinoma
Source: Research Square preprint supplement (doi:10.21203/rs.3.rs-1215973/v1), 2022-01-10
Supplement: Supplementary file 6 [file 6b0263e8684261ad2f8c1536.xlsx]

## Sheet: Sheet1
Supplementary Table 1. Clinicopathologic characteristics of 286 lung adenocarcinoma patients.
Characteristics	N (%)
Age, years (mean±sd)	58.9±9.0
Sex
Male	129 (45.1)
Female	157 (54.9)
Smoking status
Ever	123 (43.0)
Never	163 (57.0)
Tumor size, cm (mean±sd)	3.4±1.6
Extent of pulmonary resection
Sublobar resection	4 (1.3)
Lobectomy	262 (91.6)
Bilobectomy	13 (4.5)
Pneumonectomy	7 (2.4)
T status
T1	149 (52.1)
T2	105 (36.7)
T3	18 (6.3)
T4	14 (4.9)
N status
N0	142 (49.7)
N1	27 (9.4)
N2	117 (40.9)
TNM stage
IA	77 (26.9)
IB	43 (15.0)
IIA	11 (3.8)
IIB	30 (10.5)
IIIA	107 (37.4)
IIIB	18 (6.2)
Predominant pattern
Acinar	178 (62.2)
Papillary	16 (5.6)
Micropapillary	29 (10.1)
Solid	12 (4.2)
Lepidic	51 (17.8)
