# Supplementary material for: Genomic and Immunological Features of Micropapillary Pattern in Lung Adenocarcinoma
Source: Research Square preprint supplement (doi:10.21203/rs.3.rs-1215973/v1), 2022-01-10
Supplement: Supplementary file 7 [file 880db91f4f3568fa48b0cff8.xlsx]

## Sheet: Sheet1
Supplementary Table 2. DFS and OS information of the selected patients.
DFS Status	OS Status	DFS	OS	Histological subtype
UNKNOWN	DECEASED	2.96667	2.96667	Acinar
UNKNOWN	DECEASED	3.83333	3.83333	Acinar
RECURRED/PROGRESSED	DECEASED	4.36667	4.36667	Acinar
RECURRED/PROGRESSED	DECEASED	1	4.96667	Acinar
UNKNOWN	DECEASED	5.53333	5.53333	Acinar
UNKNOWN	DECEASED	6	6	Acinar
RECURRED/PROGRESSED	DECEASED	2	7	Acinar
UNKNOWN	DECEASED	7	7	Acinar
RECURRED/PROGRESSED	DECEASED	7.3	7.3	Solid
RECURRED/PROGRESSED	DECEASED	1	9	Acinar
RECURRED/PROGRESSED	DECEASED	9	11	Micropapillary
UNKNOWN	DECEASED	11.0333	11.0333	Acinar
RECURRED/PROGRESSED	DECEASED	7	12	Acinar
RECURRED/PROGRESSED	DECEASED	10	12	Acinar
RECURRED/PROGRESSED	DECEASED	11	13.9	Acinar
UNKNOWN	DECEASED	16.2667	16.2667	Solid
RECURRED/PROGRESSED	DECEASED	4	17	Micropapillary
RECURRED/PROGRESSED	DECEASED	6	17.9667	Micropapillary
RECURRED/PROGRESSED	DECEASED	11	18	Micropapillary
UNKNOWN	DECEASED	19	19	Solid
RECURRED/PROGRESSED	DECEASED	9	19.3333	Micropapillary
UNKNOWN	DECEASED	20.6333	20.6333	Solid
RECURRED/PROGRESSED	DECEASED	12	21	Acinar
RECURRED/PROGRESSED	DECEASED	17	21	Micropapillary
UNKNOWN	DECEASED	21	21	Acinar
RECURRED/PROGRESSED	DECEASED	11	21.3667	Acinar
RECURRED/PROGRESSED	DECEASED	3	21.9333	Micropapillary
RECURRED/PROGRESSED	DECEASED	15	22	Acinar
UNKNOWN	DECEASED	22	22	Acinar
RECURRED/PROGRESSED	DECEASED	7	23	Micropapillary
RECURRED/PROGRESSED	DECEASED	15	23	Micropapillary
UNKNOWN	DECEASED	23.3333	23.3333	Acinar
RECURRED/PROGRESSED	DECEASED	13	23.4333	Acinar
RECURRED/PROGRESSED	DECEASED	18	23.4667	Micropapillary
RECURRED/PROGRESSED	DECEASED	23.8667	23.8667	Acinar
RECURRED/PROGRESSED	DECEASED	11	23.9	Solid
RECURRED/PROGRESSED	DECEASED	11	24.2333	Micropapillary
RECURRED/PROGRESSED	DECEASED	10	24.7	Solid
UNKNOWN	DECEASED	25	25	Micropapillary
RECURRED/PROGRESSED	DECEASED	13	25.4333	Acinar
RECURRED/PROGRESSED	DECEASED	11	26	Solid
RECURRED/PROGRESSED	DECEASED	23	27.6667	Acinar
RECURRED/PROGRESSED	DECEASED	9	28	Acinar
RECURRED/PROGRESSED	DECEASED	20	28	Acinar
RECURRED/PROGRESSED	DECEASED	25	28	Acinar
RECURRED/PROGRESSED	DECEASED	3	28.6667	Micropapillary
RECURRED/PROGRESSED	DECEASED	20	29.7	Acinar
RECURRED/PROGRESSED	DECEASED	24	30.8667	Acinar
RECURRED/PROGRESSED	DECEASED	15	31	Acinar
UNKNOWN	DECEASED	31.1333	31.1333	Acinar
RECURRED/PROGRESSED	DECEASED	22	31.3	Acinar
RECURRED/PROGRESSED	DECEASED	17	31.4	Acinar
RECURRED/PROGRESSED	DECEASED	11	31.4667	Acinar
RECURRED/PROGRESSED	DECEASED	2	33.8333	Solid
RECURRED/PROGRESSED	DECEASED	23	34	Acinar
RECURRED/PROGRESSED	DECEASED	13	34.4	Papillary
UNKNOWN	DECEASED	35	35	Acinar
RECURRED/PROGRESSED	DECEASED	28	35.1333	Acinar
RECURRED/PROGRESSED	DECEASED	9	35.2	Acinar
RECURRED/PROGRESSED	DECEASED	15	35.4333	Papillary
RECURRED/PROGRESSED	DECEASED	25	35.5	Acinar
DISEASE FREE	DECEASED	35.6	35.6	Papillary
RECURRED/PROGRESSED	DECEASED	10	35.8	Acinar
RECURRED/PROGRESSED	DECEASED	19	35.8333	Lepidic
RECURRED/PROGRESSED	DECEASED	6	36	Micropapillary
RECURRED/PROGRESSED	DECEASED	21	36	Acinar
UNKNOWN	DECEASED	36	36	Acinar
RECURRED/PROGRESSED	DECEASED	36	36	Acinar
RECURRED/PROGRESSED	DECEASED	27	37	Acinar
RECURRED/PROGRESSED	DECEASED	29	37	Acinar
UNKNOWN	DECEASED	37.9	37.9	Lepidic
RECURRED/PROGRESSED	DECEASED	11	38	Acinar
RECURRED/PROGRESSED	DECEASED	15	38	Acinar
UNKNOWN	DECEASED	38.1333	38.1333	Papillary
RECURRED/PROGRESSED	DECEASED	18	39	Acinar
RECURRED/PROGRESSED	DECEASED	18	39	Acinar
RECURRED/PROGRESSED	DECEASED	21	39.1667	Acinar
RECURRED/PROGRESSED	DECEASED	14	39.2	Acinar
RECURRED/PROGRESSED	DECEASED	29	39.4	Acinar
UNKNOWN	DECEASED	41	41	Acinar
RECURRED/PROGRESSED	DECEASED	23	42	Acinar
UNKNOWN	DECEASED	42	42	Acinar
DISEASE FREE	DECEASED	42.0333	42.0333	Lepidic
RECURRED/PROGRESSED	DECEASED	19	43.2667	Acinar
RECURRED/PROGRESSED	DECEASED	24	43.3333	Acinar
UNKNOWN	DECEASED	43.8	43.8	Acinar
RECURRED/PROGRESSED	DECEASED	35	44	Acinar
RECURRED/PROGRESSED	DECEASED	33	47	Acinar
RECURRED/PROGRESSED	DECEASED	37	47	Acinar
RECURRED/PROGRESSED	DECEASED	6	47.9333	Acinar
RECURRED/PROGRESSED	DECEASED	28	48.1667	Acinar
RECURRED/PROGRESSED	DECEASED	37	48.6667	Acinar
UNKNOWN	DECEASED	50	50	Lepidic
RECURRED/PROGRESSED	DECEASED	9	51.3333	Acinar
RECURRED/PROGRESSED	DECEASED	20	52.3333	Acinar
RECURRED/PROGRESSED	DECEASED	51	54	Micropapillary
RECURRED/PROGRESSED	DECEASED	12	54.4	Acinar
UNKNOWN	LIVING	56	56	Lepidic
RECURRED/PROGRESSED	DECEASED	33	56.4333	Acinar
RECURRED/PROGRESSED	LIVING	56	58	Acinar
RECURRED/PROGRESSED	DECEASED	24	58.6667	Acinar
UNKNOWN	LIVING	59	59	Acinar
RECURRED/PROGRESSED	DECEASED	56	59.9667	Solid
RECURRED/PROGRESSED	LIVING	11	60	Micropapillary
RECURRED/PROGRESSED	LIVING	30	60	Acinar
RECURRED/PROGRESSED	DECEASED	47	60	Acinar
UNKNOWN	LIVING	53	60	Acinar
RECURRED/PROGRESSED	LIVING	53	60	Lepidic
DISEASE FREE	LIVING	60	60	Lepidic
UNKNOWN	LIVING	60	60	Acinar
DISEASE FREE	LIVING	60	60	Lepidic
DISEASE FREE	LIVING	60	60	Micropapillary
DISEASE FREE	LIVING	60	60	Acinar
DISEASE FREE	LIVING	60	60	Solid
DISEASE FREE	LIVING	60	60	Papillary
UNKNOWN	LIVING	60	60	Acinar
DISEASE FREE	LIVING	60	60	Acinar
DISEASE FREE	LIVING	60	60	Acinar
UNKNOWN	LIVING	60	60	Lepidic
DISEASE FREE	LIVING	60	60	Lepidic
DISEASE FREE	LIVING	60	60	Acinar
DISEASE FREE	LIVING	60	60	Acinar
RECURRED/PROGRESSED	LIVING	64	60	Acinar
RECURRED/PROGRESSED	LIVING	22	61	Papillary
RECURRED/PROGRESSED	LIVING	33	61	Micropapillary
UNKNOWN	LIVING	61	61	Lepidic
DISEASE FREE	LIVING	61	61	Lepidic
DISEASE FREE	LIVING	61	61	Lepidic
DISEASE FREE	LIVING	61	61	Micropapillary
DISEASE FREE	LIVING	61	61	Acinar
DISEASE FREE	LIVING	61	61	Acinar
DISEASE FREE	LIVING	62	62	Acinar
RECURRED/PROGRESSED	LIVING	62	62	Acinar
DISEASE FREE	LIVING	62	62	Acinar
RECURRED/PROGRESSED	DECEASED	19	62.4333	Solid
RECURRED/PROGRESSED	DECEASED	36	62.4333	Micropapillary
RECURRED/PROGRESSED	DECEASED	33	62.5667	Acinar
RECURRED/PROGRESSED	DECEASED	43	63	Acinar
UNKNOWN	LIVING	63	63	Acinar
DISEASE FREE	LIVING	63	63	Acinar
RECURRED/PROGRESSED	LIVING	9	64	Acinar
RECURRED/PROGRESSED	LIVING	48	64	Acinar
DISEASE FREE	DECEASED	64.5	64.5	Solid
RECURRED/PROGRESSED	DECEASED	59	65	Acinar
DISEASE FREE	LIVING	65	65	Papillary
DISEASE FREE	LIVING	65	65	Lepidic
DISEASE FREE	LIVING	65	65	Acinar
UNKNOWN	LIVING	65	65	Acinar
UNKNOWN	DECEASED	65	65	Lepidic
RECURRED/PROGRESSED	DECEASED	23	66	Micropapillary
RECURRED/PROGRESSED	LIVING	26	66	Acinar
RECURRED/PROGRESSED	LIVING	35	66	Acinar
DISEASE FREE	LIVING	66	66	Lepidic
DISEASE FREE	LIVING	66	66	Acinar
DISEASE FREE	LIVING	66	66	Lepidic
UNKNOWN	LIVING	66	66	Acinar
UNKNOWN	DECEASED	66	66	Acinar
RECURRED/PROGRESSED	DECEASED	57	66.9333	Lepidic
DISEASE FREE	LIVING	67	67	Acinar
UNKNOWN	LIVING	67	67	Acinar
UNKNOWN	DECEASED	67.0333	67.0333	Lepidic
RECURRED/PROGRESSED	LIVING	13	68	Acinar
RECURRED/PROGRESSED	LIVING	62	68	Acinar
RECURRED/PROGRESSED	DECEASED	29	68.5667	Acinar
RECURRED/PROGRESSED	LIVING	57	69	Acinar
UNKNOWN	LIVING	69	69	Acinar
DISEASE FREE	LIVING	69	69	Lepidic
DISEASE FREE	LIVING	69	69	Acinar
RECURRED/PROGRESSED	LIVING	30	71	Acinar
UNKNOWN	LIVING	71	71	Acinar
UNKNOWN	LIVING	71	71	Lepidic
DISEASE FREE	LIVING	71	71	Acinar
RECURRED/PROGRESSED	LIVING	16	72	Micropapillary
RECURRED/PROGRESSED	LIVING	33	72	Papillary
DISEASE FREE	LIVING	72	72	Lepidic
DISEASE FREE	LIVING	72	72	Lepidic
UNKNOWN	LIVING	72	72	Lepidic
RECURRED/PROGRESSED	LIVING	23	73	Acinar
RECURRED/PROGRESSED	LIVING	30	73	Acinar
RECURRED/PROGRESSED	LIVING	51	73	Acinar
RECURRED/PROGRESSED	LIVING	71	73	Lepidic
UNKNOWN	LIVING	73	73	Micropapillary
UNKNOWN	LIVING	73	73	Acinar
UNKNOWN	LIVING	73	73	Acinar
UNKNOWN	LIVING	73	73	Lepidic
UNKNOWN	LIVING	73	73	Lepidic
UNKNOWN	LIVING	73	73	Acinar
UNKNOWN	LIVING	73	73	Papillary
UNKNOWN	LIVING	73	73	Papillary
RECURRED/PROGRESSED	LIVING	33	74	Acinar
UNKNOWN	LIVING	74	74	Acinar
UNKNOWN	LIVING	74	74	Acinar
UNKNOWN	LIVING	74	74	Papillary
UNKNOWN	LIVING	74	74	Lepidic
UNKNOWN	LIVING	74	74	Acinar
RECURRED/PROGRESSED	LIVING	8	75	Acinar
RECURRED/PROGRESSED	LIVING	19	75	Micropapillary
RECURRED/PROGRESSED	LIVING	43	75	Papillary
RECURRED/PROGRESSED	LIVING	43	75	Acinar
UNKNOWN	LIVING	75	75	Micropapillary
UNKNOWN	LIVING	75	75	Acinar
UNKNOWN	LIVING	75	75	Lepidic
UNKNOWN	LIVING	75	75	Acinar
DISEASE FREE	LIVING	75	75	Acinar
UNKNOWN	LIVING	75	75	Acinar
UNKNOWN	LIVING	75	75	Lepidic
UNKNOWN	LIVING	75	75	Acinar
DISEASE FREE	LIVING	75	75	Acinar
UNKNOWN	LIVING	75	75	Acinar
RECURRED/PROGRESSED	LIVING	20	76	Acinar
RECURRED/PROGRESSED	LIVING	40	76	Lepidic
RECURRED/PROGRESSED	LIVING	61	76	Acinar
RECURRED/PROGRESSED	LIVING	62	76	Acinar
UNKNOWN	LIVING	76	76	Acinar
UNKNOWN	LIVING	76	76	Lepidic
UNKNOWN	LIVING	76	76	Acinar
DISEASE FREE	LIVING	76	76	Lepidic
UNKNOWN	LIVING	76	76	Acinar
DISEASE FREE	LIVING	76	76	Micropapillary
UNKNOWN	LIVING	76	76	Acinar
UNKNOWN	LIVING	76	76	Acinar
UNKNOWN	LIVING	76	76	Acinar
RECURRED/PROGRESSED	LIVING	9	77	Acinar
RECURRED/PROGRESSED	LIVING	10	77	Acinar
RECURRED/PROGRESSED	LIVING	49	77	Acinar
DISEASE FREE	LIVING	77	77	Acinar
UNKNOWN	LIVING	77	77	Lepidic
DISEASE FREE	LIVING	77	77	Acinar
UNKNOWN	LIVING	77	77	Acinar
DISEASE FREE	LIVING	77	77	Acinar
UNKNOWN	DECEASED	77	77	Lepidic
RECURRED/PROGRESSED	LIVING	60	78	Acinar
DISEASE FREE	LIVING	78	78	Acinar
UNKNOWN	LIVING	78	78	Acinar
DISEASE FREE	LIVING	78	78	Papillary
RECURRED/PROGRESSED	LIVING	54	79	Acinar
DISEASE FREE	LIVING	79	79	Lepidic
UNKNOWN	LIVING	80	80	Acinar
DISEASE FREE	LIVING	80	80	Acinar
DISEASE FREE	LIVING	80	80	Lepidic
DISEASE FREE	LIVING	81	81	Acinar
DISEASE FREE	LIVING	81	81	Acinar
RECURRED/PROGRESSED	LIVING	41	82	Acinar
DISEASE FREE	LIVING	82	82	Lepidic
DISEASE FREE	LIVING	82	82	Acinar
RECURRED/PROGRESSED	LIVING	13	84	Acinar
RECURRED/PROGRESSED	LIVING	23	84	Acinar
DISEASE FREE	LIVING	84	84	Acinar
DISEASE FREE	LIVING	84	84	Acinar
DISEASE FREE	LIVING	84	84	Acinar
DISEASE FREE	LIVING	84	84	Acinar
RECURRED/PROGRESSED	LIVING	13	85	Acinar
RECURRED/PROGRESSED	LIVING	39	85	Acinar
RECURRED/PROGRESSED	LIVING	85	85	Lepidic
DISEASE FREE	LIVING	85	85	Lepidic
UNKNOWN	LIVING	85	85	Acinar
UNKNOWN	LIVING	85	85	Acinar
UNKNOWN	LIVING	85	85	Lepidic
DISEASE FREE	LIVING	86	86	Lepidic
DISEASE FREE	LIVING	86	86	Papillary
DISEASE FREE	LIVING	88	88	Lepidic
RECURRED/PROGRESSED	LIVING	76	89	Acinar
UNKNOWN	LIVING	89	89	Lepidic
RECURRED/PROGRESSED	LIVING	47	90	Micropapillary
UNKNOWN	LIVING	90	90	Acinar
UNKNOWN	LIVING	90	90	Lepidic
UNKNOWN	LIVING	90	90	Acinar
RECURRED/PROGRESSED	LIVING	14	91	Acinar
RECURRED/PROGRESSED	LIVING	47	91	Lepidic
UNKNOWN	LIVING	92	92	Acinar
UNKNOWN	LIVING	92	92	Lepidic
UNKNOWN	LIVING	92	92	Lepidic
RECURRED/PROGRESSED	LIVING	59	93	Acinar
UNKNOWN	LIVING	93	93	Micropapillary
UNKNOWN	DECEASED	93	93	Acinar
RECURRED/PROGRESSED	LIVING	40	94	Acinar
UNKNOWN	LIVING	94	94	Acinar
UNKNOWN	LIVING	94	94	Acinar
UNKNOWN	LIVING	94	94	Lepidic
UNKNOWN	LIVING	94	94	Acinar
UNKNOWN	LIVING	94	94	Acinar
UNKNOWN	LIVING	97	97	Papillary
DISEASE FREE	LIVING	97	97	Micropapillary
UNKNOWN	LIVING	97	97	Papillary
UNKNOWN	LIVING	99	99	Lepidic
DISEASE FREE	LIVING	101	101	Lepidic
