# Supplementary material for: Genomic and Immunological Features of Micropapillary Pattern in Lung Adenocarcinoma
Source: Research Square preprint supplement (doi:10.21203/rs.3.rs-1215973/v1), 2022-01-10
Supplement: Supplementary file 8 [file c0d0b6247542602a31e406f2.xlsx]

## Sheet: Sheet1
Supplementary Table 4. Sequencing data quality metrics for selected samples.
Sample	Q30 Percentage (%)	Total Reads (M)	Fraction of uniquely mapped reads on target （%）
Patient1_LEP	93.51	564.48	89.07
Patient1_MIP	93.13	447.17	87.57
Patient2_LEP	93.98	671.46	86.53
Patient2_MIP	93.50	286.38	89.11
Patient3_LEP	92.09	414.62	85.89
Patient3_MIP	92.71	387.09	84.51
Patient4_LEP	93.10	452.14	85.56
Patient4_MIP	93.55	561.01	84.79
Patient5_LEP	90.46	478.96	82.25
Patient5_MIP	90.36	423.55	81.82
Patient6_MIP	93.35	547.71	84.55
