# Supplementary material for: Genomic and Immunological Features of Micropapillary Pattern in Lung Adenocarcinoma
Source: Research Square preprint supplement (doi:10.21203/rs.3.rs-1215973/v1), 2022-01-10
Supplement: Supplementary file 9 [file db014a68bc2018cefaa14637.xlsx]

## Sheet: Sheet1
Supplementary Table 3. Clinicopathologic Characteristics of laser-dissected samples (n=6).
Case	Age	Sex	Smoking history	Location	Pathological Stage	Surgery Type	R Resection	Diameter,cm
1	61	M	Yes	Left-Upper	IB	Lobectomy	R0	3.5
2	46	M	Yes	Right-Upper	IA2	Lobectemy	R0	2
3	75	F	No	Left-Lower	IA3	Lobectomy	R0	2.7
4	57	F	No	Left-Upper	IA3	Lobectomy	R0	3
5	62	M	Yes	Left-Upper	ⅢA	Wedge	R1	3
6	60	F	No	Left-Upper	Ⅳ	Wedge	R1	3
