# Supplementary figures and images for: Genomic and Immunological Features of Micropapillary Pattern in Lung Adenocarcinoma
Source: Research Square preprint supplement (doi:10.21203/rs.3.rs-1215973/v1), 2022-01-10

**A**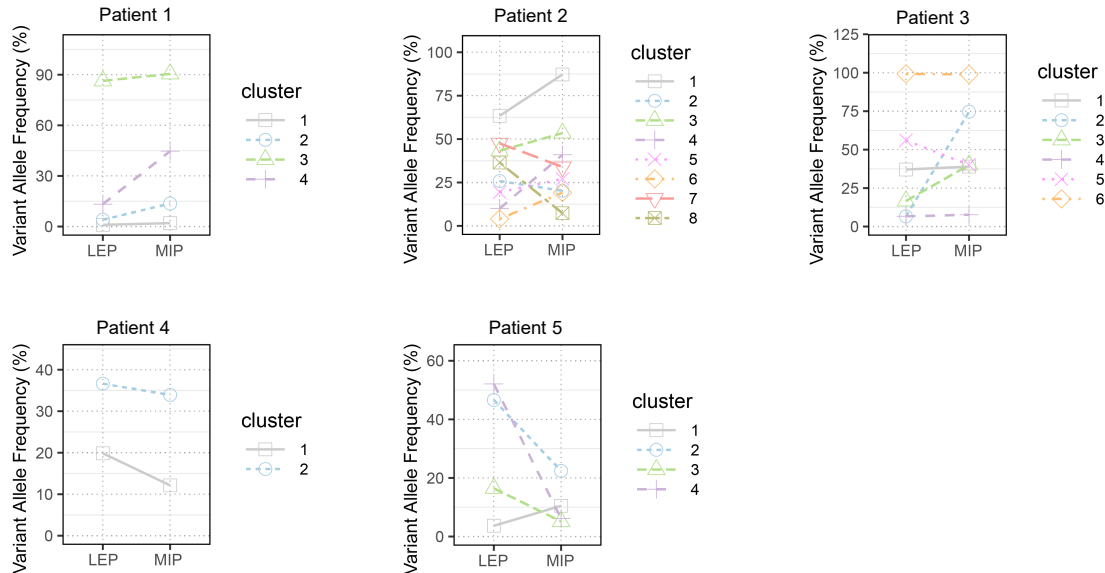**B**

Clusters with increased VAF in LEP

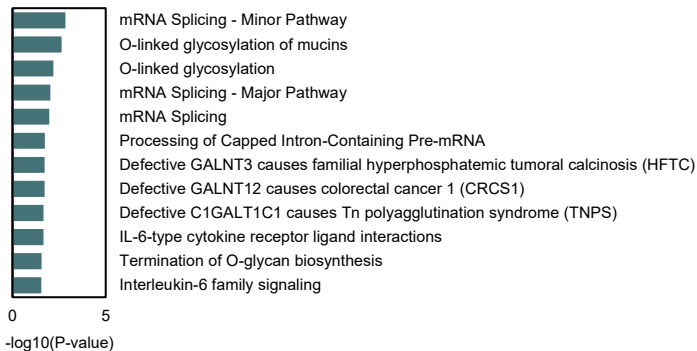**C**

Clusters with increased VAF in MIP

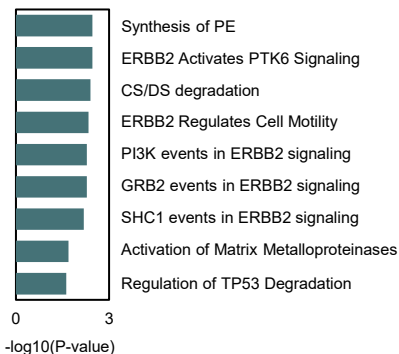

Supplement: Supplementary file 1 [file 37f9add43abed10396c1a5d8.pdf]

A

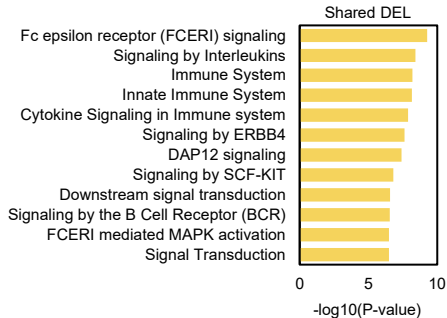

B

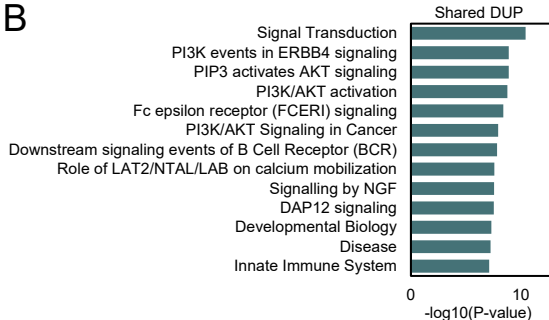

Supplement: Supplementary file 2 [file 9bc3ab3284b5e6edab696b40.pdf]

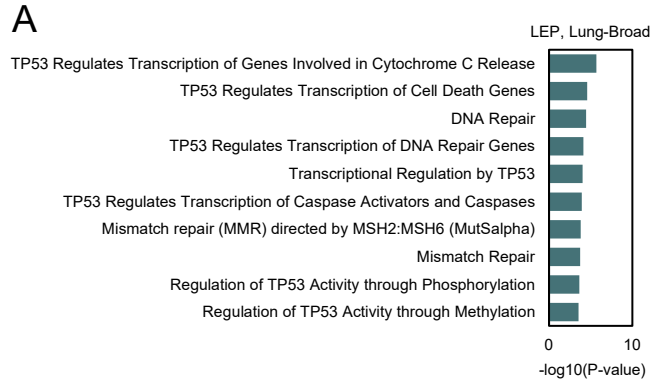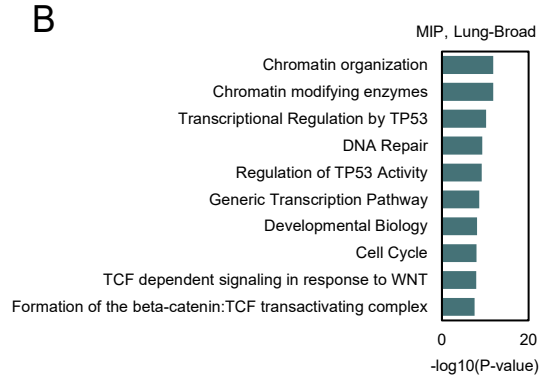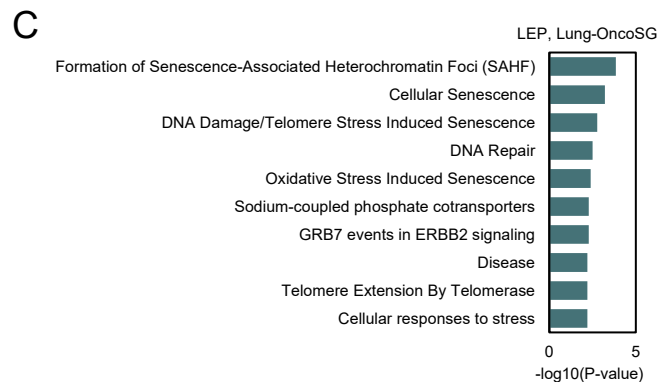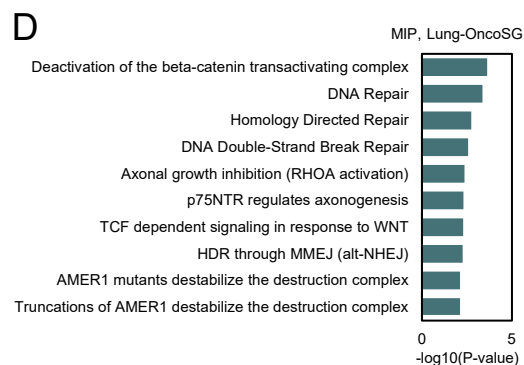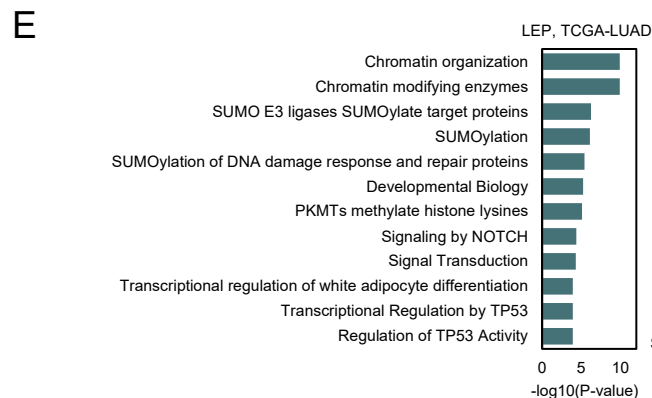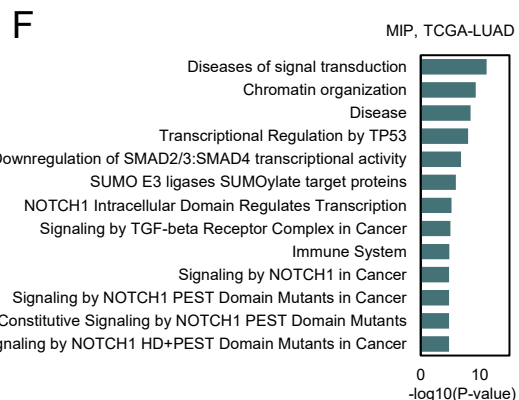

Supplement: Supplementary file 3 [file c0e6a9ca8ad9a525b383afdf.pdf]

A

LEP, Lung-Broad

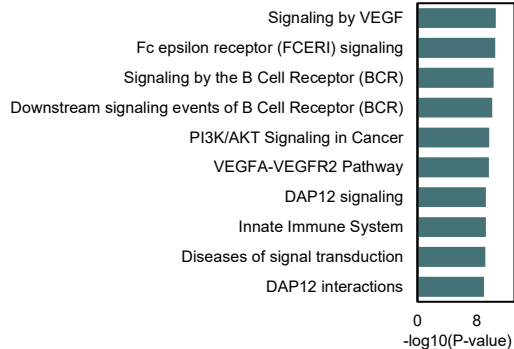

B

MIP, Lung-Broad

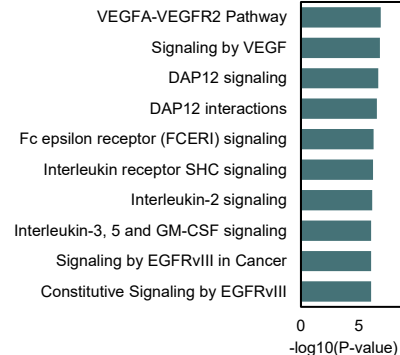

C

LEP, Lung-OncoSG

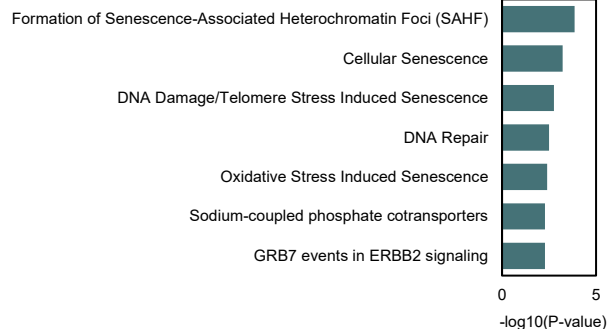

D

MIP, Lung-OncoSG

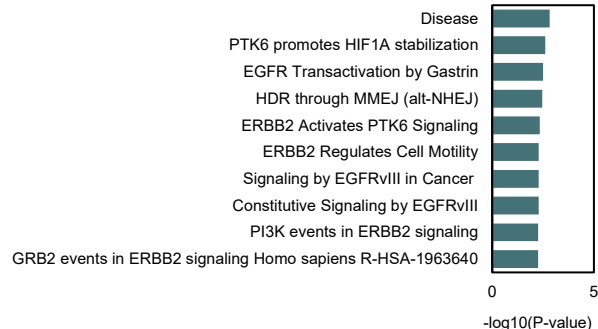

E

LEP, TCGA-LUAD

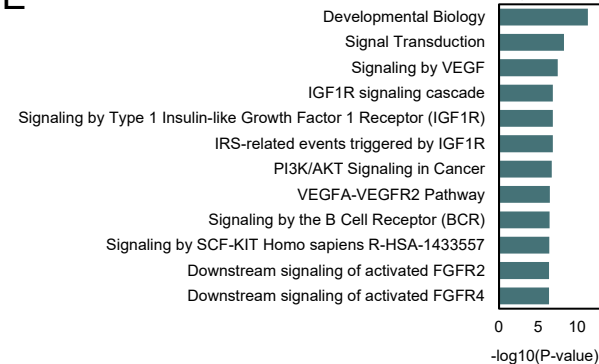

F

MIP, TCGA-LUAD

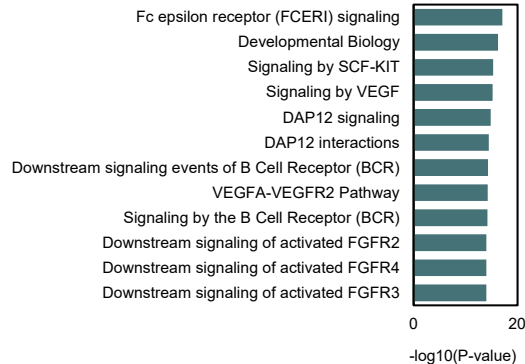

Supplement: Supplementary file 4 [file c229c101139b95d7f28760ab.pdf]

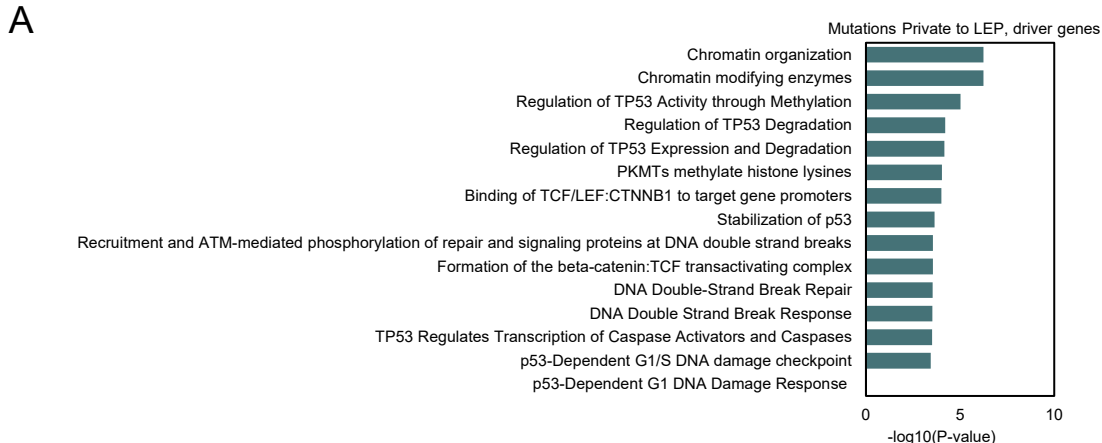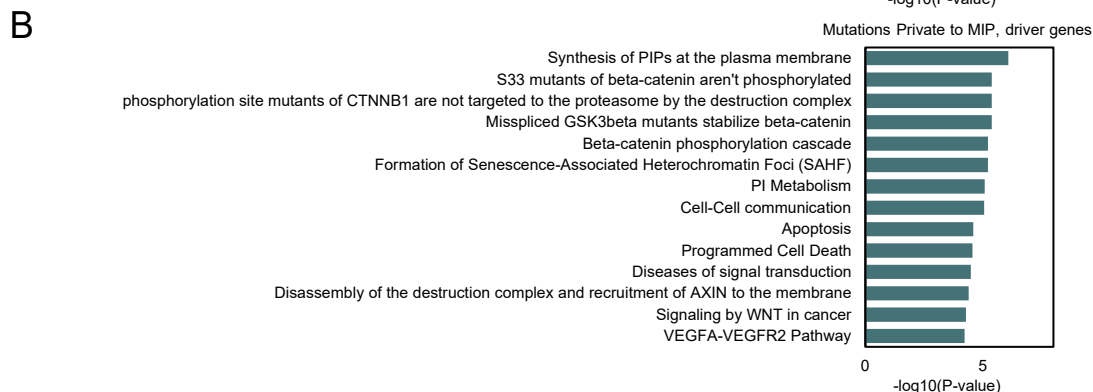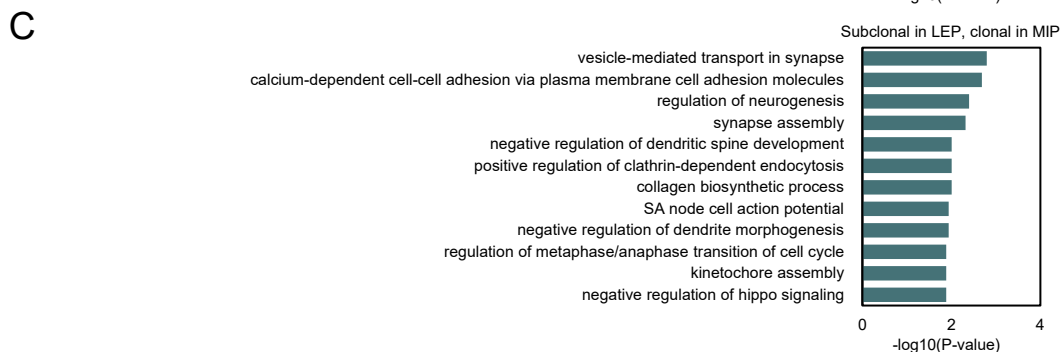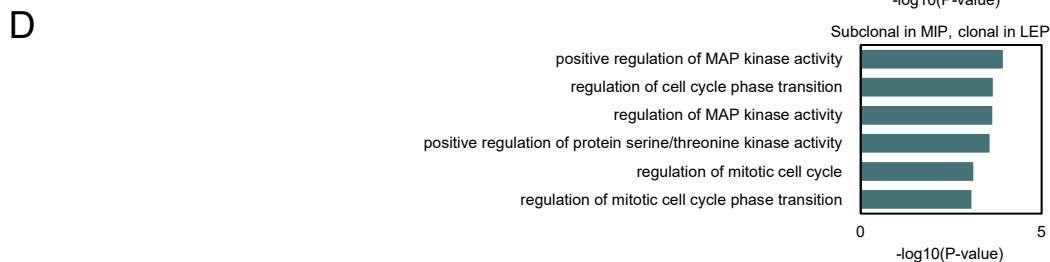

Supplement: Supplementary file 5 [file d94a87e4787a4abac974eb81.pdf]

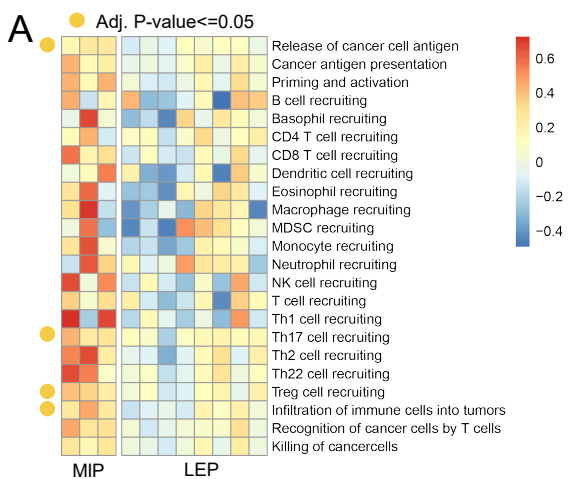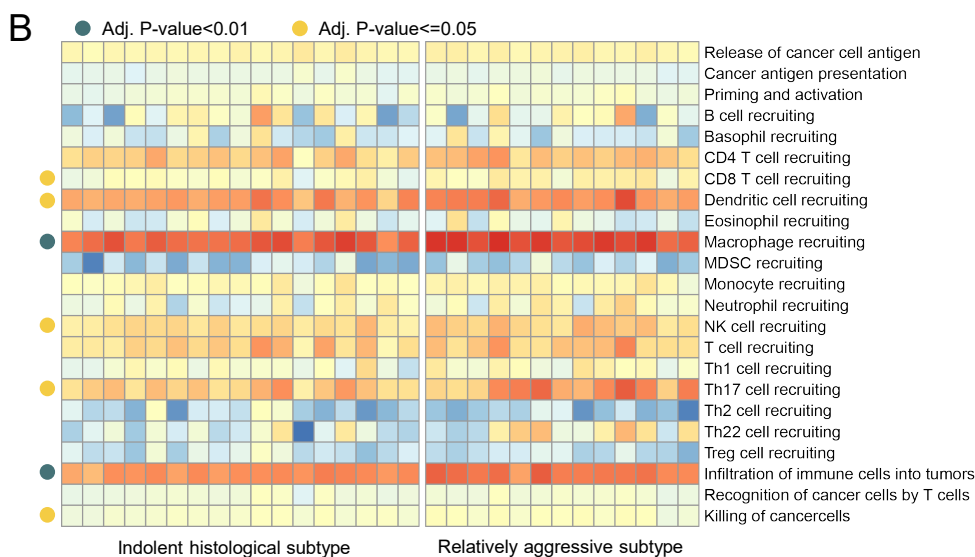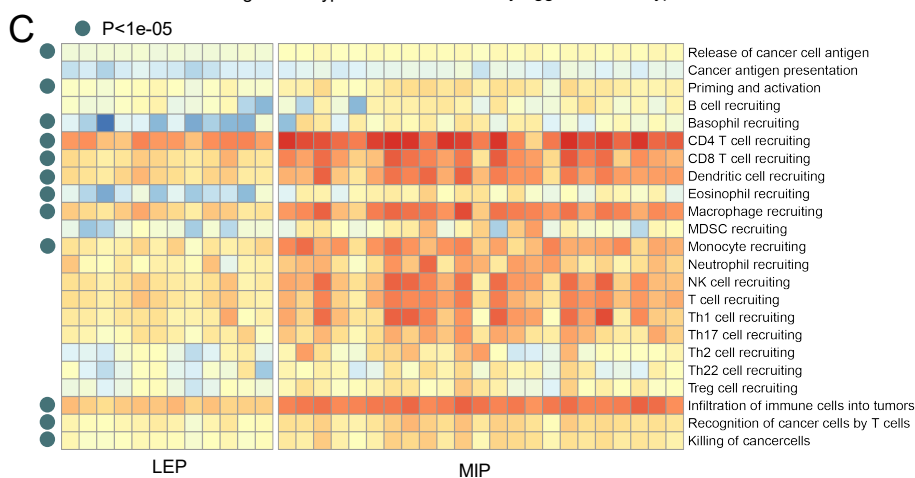

Supplement: Supplementary file 6 [file e69019c9bb99c815b09137b3.pdf]
